# Supplementary material for: Dual-responsive magnetic nanodroplets for controlled oxygen release via ultrasound and magnetic stimulation
Source: Royal Society of Chemistry journal article supplement (doi:10.1039/d3nr04925f), 2023-12-05
Supplement: d3nr04925f1.pdf [file d3nr04925f1.pdf]

*Electronic Supplementary Information for*

**Dual-responsive Magnetic Nanodroplets for Controlled Oxygen Release via  
Ultrasound and Magnetic Stimulation**

*Simone Galati,<sup>a,b,\*</sup> Marta Vassallo,<sup>a,b,\*</sup> Marta Vicentini,<sup>a</sup> Marta Vallino,<sup>c</sup> Federica Celegato,<sup>a</sup>  
Gabriele Barrera,<sup>a</sup> Daniele Martella,<sup>a,d,e</sup> Elena Sonia Olivetti,<sup>a</sup> Alessio Sacco,<sup>a</sup> Jessica Petiti,<sup>a</sup> Carla  
Divieto,<sup>a</sup> Paola Tiberto,<sup>a</sup> Alessandra Manzin<sup>a</sup> and Adriano Troia<sup>a</sup>*

<sup>a</sup> *Istituto Nazionale di Ricerca Metrologica (INRiM), Strada delle Cacce 91, Torino 10135, Italy*

<sup>b</sup> *Politecnico di Torino, Corso Duca degli Abruzzi 24, Torino 10129, Italy*

<sup>c</sup> *Consiglio Nazionale delle Ricerche (CNR), Strada delle Cacce 73, Torino 10135, Italy*

<sup>d</sup> *European Laboratory for Non-Linear Spectroscopy (LENS), Via Nello Carrara 1, Sesto Fiorentino 50019,  
Italy*

<sup>e</sup> *Università degli Studi di Firenze, Via della Lastruccia 3, Sesto Fiorentino 50019, Italy*

\*Corresponding author. E-mail: [simone.galati@polito.it](mailto:simone.galati@polito.it), [marta.vassallo@polito.it](mailto:marta.vassallo@polito.it)

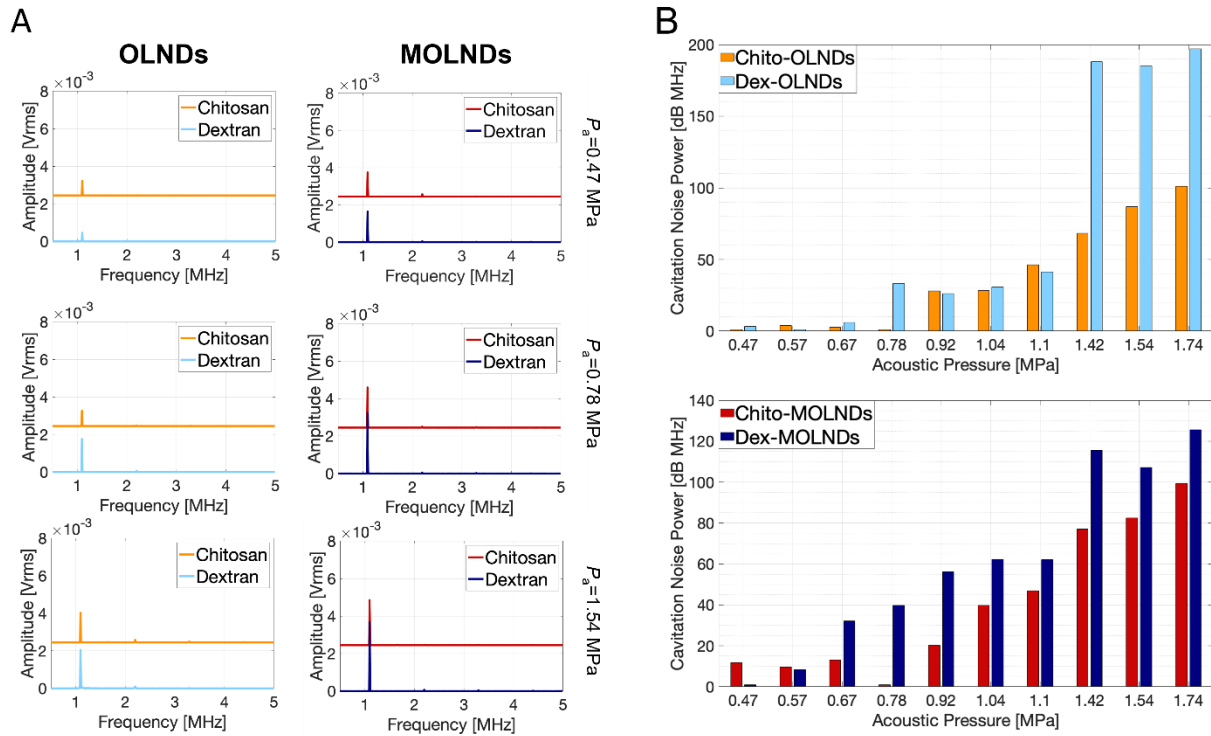

**Figure S1.** (A) FTT spectra of PFP-core OLNDs and MOLNDs with chitosan and dextran coating, measured at three acoustic pressures (0.47, 0.78 and 1.54 MPa). (B) Cavitation Noise Power (CNP) values evaluated in the acoustic pressure range 0.47–1.74 MPa for PFP-core nanodroplets: comparison between OLNDs (top) and MOLNDs (bottom). The reported results are based on the average of three acquired values.

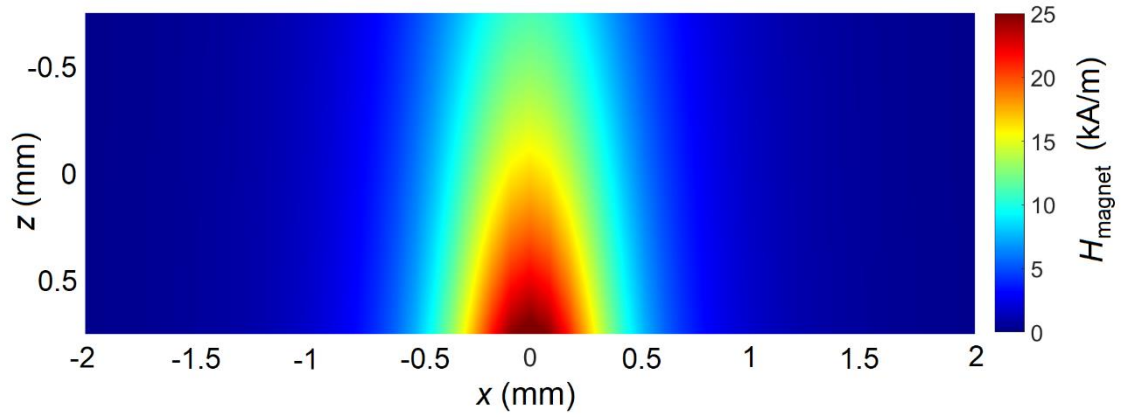

**Figure S2.** Spatial distribution of the amplitude of the magnetic field produced by the permanent magnet in the  $xz$ -plane. The magnet is assumed to be uniformly magnetized along the out-of-plane direction, with a magnetization of  $715 \text{ kA m}^{-1}$ . The magnetization value was chosen to guarantee a good agreement between simulation and magnetic field measurement results obtained with a Hall probe.

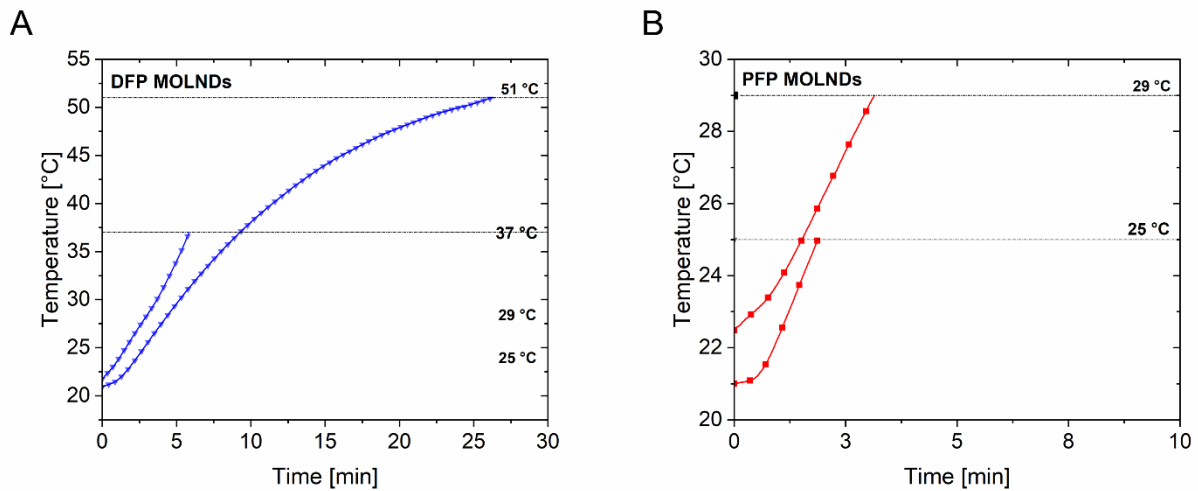

**Figure S3.** Heating curves of chitosan-coated MOLNDs with (A) DFP- and (B) PFP-core.

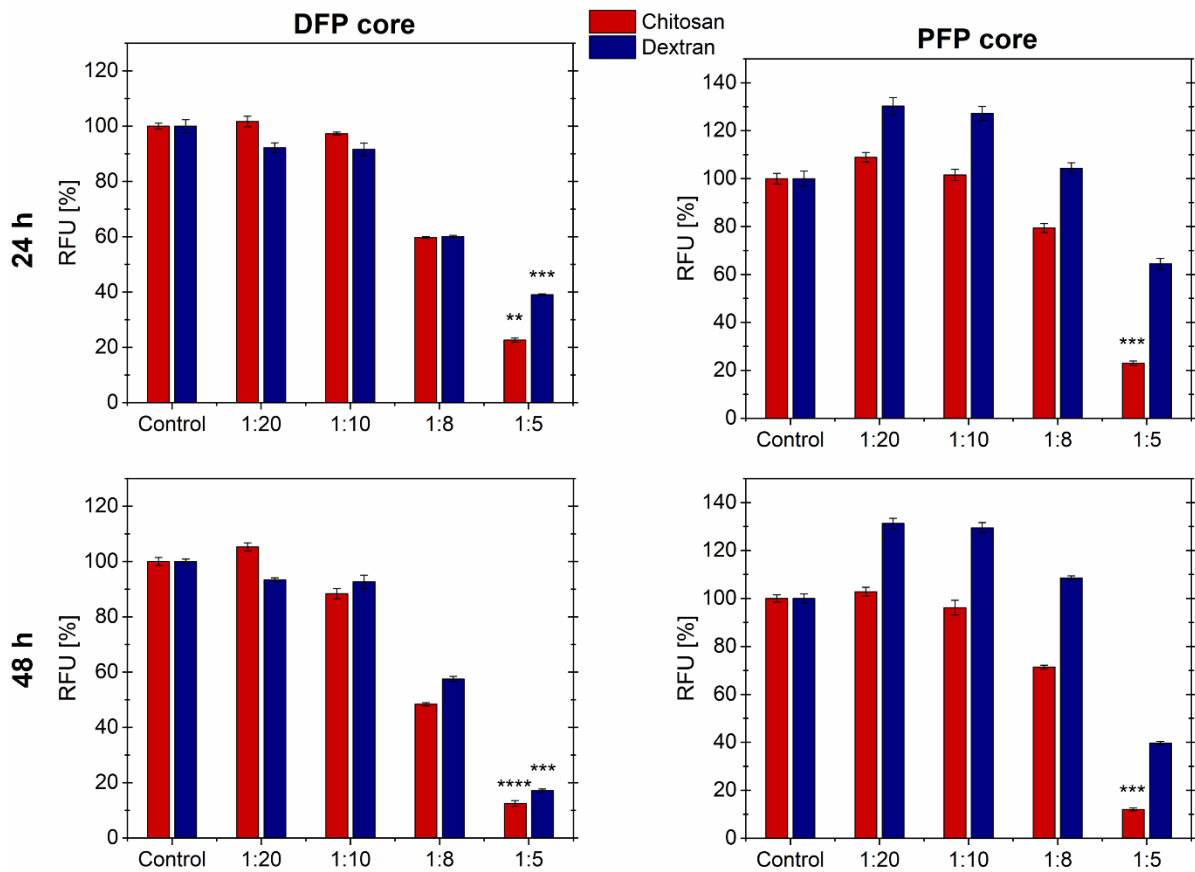

**Figure S4.** Cell viability assessment (% RFU) on A549 cell culture after 24- and 48-hour incubation with MOLNDs using resazurin assay. Control refers to cells without MOLND treatment, while other cell samples were treated with four different dilutions of MOLNDs (1:20, 1:10, 1:8, and 1:5) in the culture medium. The reported data are normalized with respect to the control, which is considered as 100%. RFU data are indicated as mean  $\pm$  SD (biological replicate  $n^\circ = 3$ ). All the analyses with a  $P < 0.05$  were indicated as statistically significant (\* $p \leq 0.05$ ; \*\*  $p \leq 0.01$ ; \*\*\*  $p \leq 0.001$ ; \*\*\*\*  $p \leq 0.0001$ ).
